# Supplementary material
Source: PubMed Central journal article supplement (PMC3074576)
Supplement: NIHMS139265-supplement-Sup_Fig_07.pdf [file NIHMS139265-supplement-Sup_Fig_07.pdf]

## A

PG1587 (1) MFLEYILEVERNLFLTLNGVQHPLLDGFFYLISAKWTWVIMSIAFLPFLF  
 Fn LpxF (1) -----MARFHIILGLVVCFFAWIFFLI

PG1587 (51) YKKPTKEALFIVGAVLLSVLICDQLSSSFKPF FARFRPSHHPDFIDYVK  
 Fn LpxF (23) FPNLDIQFAGHFYNSSAHQF IGGYDGFLGELHW FARFFPIFFSIIIVILFL

PG1587 (101) TVYGYRGGKYGFISGHTTNYISLALFTSRIFRNKFYTWTIWS----VVAL  
 Fn LpxF (73) LGSFLID-KFKIKYRKAIFFLAVCLWIGPGLVVNVYFKDHWGRPRPVME

PG1587 (147) VIYSRIYIGVHFITDIIPGIAVGLIVGHFVYKVLYARSRWLGAS---CP  
 Fn LpxF (122) QFNGDKIFQPPFVISSQCDKNC SFVCGDASMGFWLFAFMPLLATRKKKLV

PG1587 (194) AHPSAVYAGDSIRLWTL SLIGFVFAMLCMSRQLTEILQYYVFLLF  
 Fn LpxF (172) AFIAAVVAGGGLGLMRMSQGHFFSDVVFCGIFVYISTWVVYALMYRKKEY

## B

PG1773 (1) -----MNRES FLLLLVLLFALPLHLQASSPCNNMADTTCISDSA  
 Fn LpxE (1) MLKQTLQTNFQGFKDIFKKPKLHNHKLPRYLQLKYTFIPLLLIVIFAYYN

PG1773 (40) KMFPPAIGVYHVKP--MKNTRLRHSPLVAASLLTFNVDDNIRELRFITGAG  
 Fn LpxE (51) LDT PVENYIKHSM PNIVGVIFGKITDVGKA EYILIICGVIVLARLFTDSQ

PG1773 (88) SFHTKIDNVSQLVPLMAQLSMRGFGYKGRSKSWGKMLVSDALGMALMGM  
 Fn LpxE (101) KLSANTRAMFDKVSAYAGFILATVAISGILG---QILKMIIGRARPCKFF

PG1773 (138) VNAGKYSFGRLRPDGTAA NSYPSGHTATAFACATLPHLEYGSRSPWYSAA  
 Fn LpxE (147) LEYGSHYFQHFHAPGYDFASMPSGHSITVGAMFIAFFYIF----PKLRYF

PG1773 (188) GYTVASLTGISRIVNNRHWA SDVLCGAAVGILVGELGYWISDLIFRDPTG  
 Fn LpxE (193) WYLLIVVFAGSRIMVGSHPYSDVIFGVAFGCYCTAYIYYWMRNREII

PG1773 (238) YNYKLTKKQEGTLESMVISLSTGNRYINRQMDFEGKTVERTDAFGMNLKT

PG1773 (288) TFNPSFARWVRIGSQFSVSTEQKVLTRERPAKVVFVAPAI SLGLSAGVEW

PG1773 (338) HPWQRASVWAEILPSILFRTDFTNAQDEPDEMSSKLHRRSSFQPAFQVGV

PG1773 (388) AYRVSDHMGIEAHAGYQLGEAVYHLMEETSTWSIIKKRATVPYRGFEFAV

PG1773 (438) GLQFYPPFR
