# Supplementary material
Source: PubMed Central journal article supplement (PMC3074576)

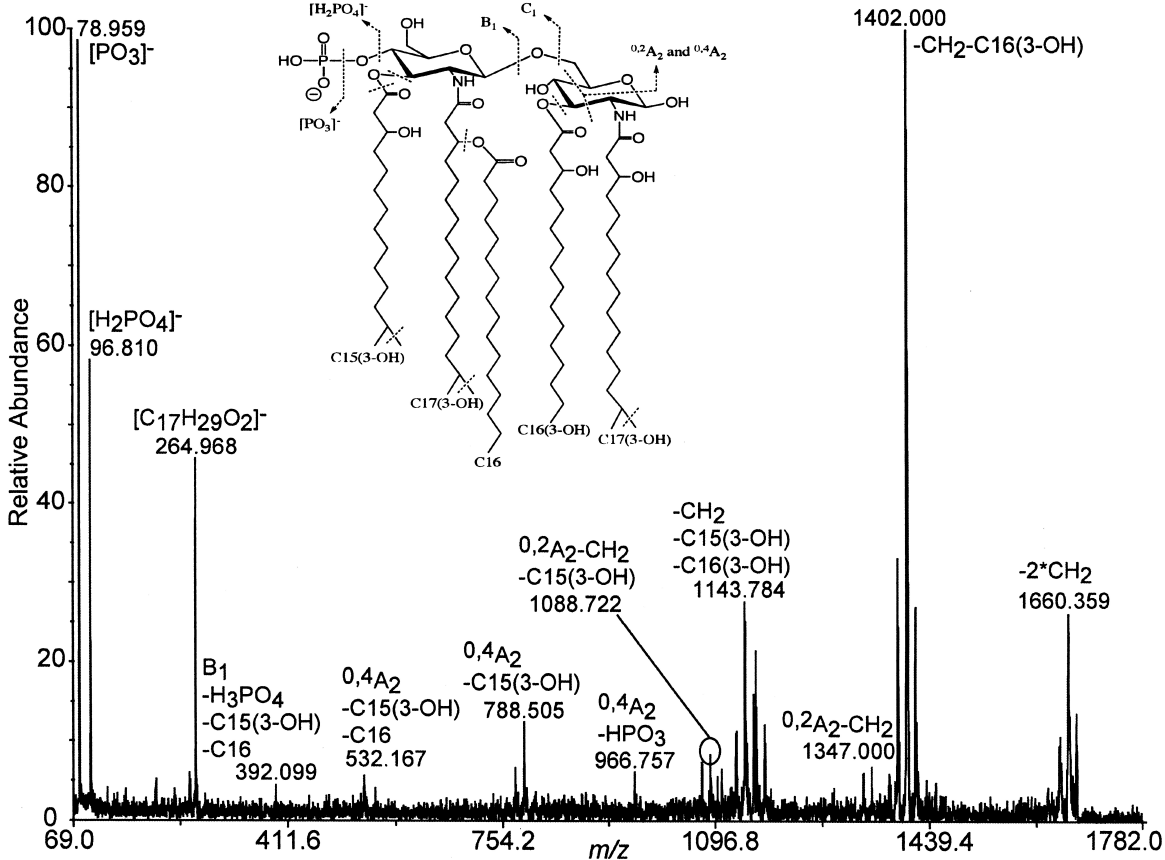

Supplement: NIHMS139265-supplement-Sup_Fig_01.pdf [file NIHMS139265-supplement-Sup_Fig_01.pdf]

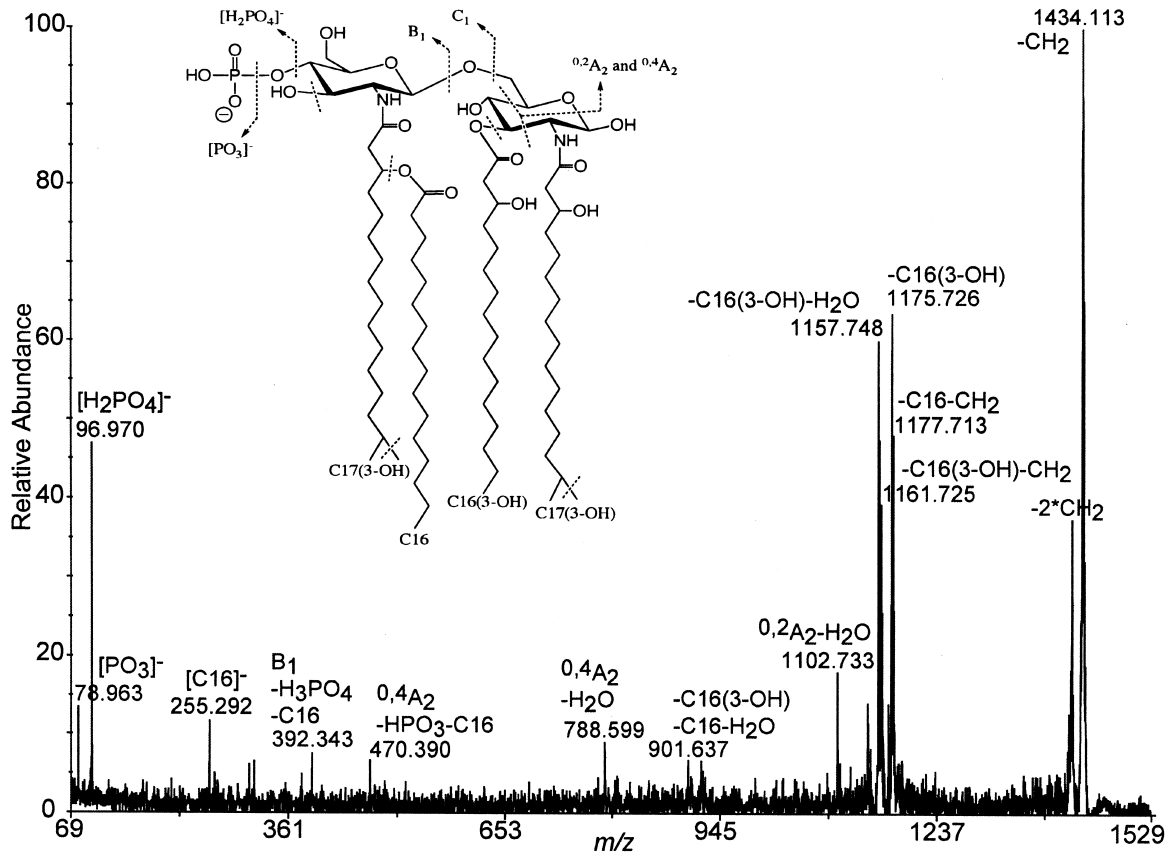

Supplement: NIHMS139265-supplement-Sup_Fig_02.pdf [file NIHMS139265-supplement-Sup_Fig_02.pdf]

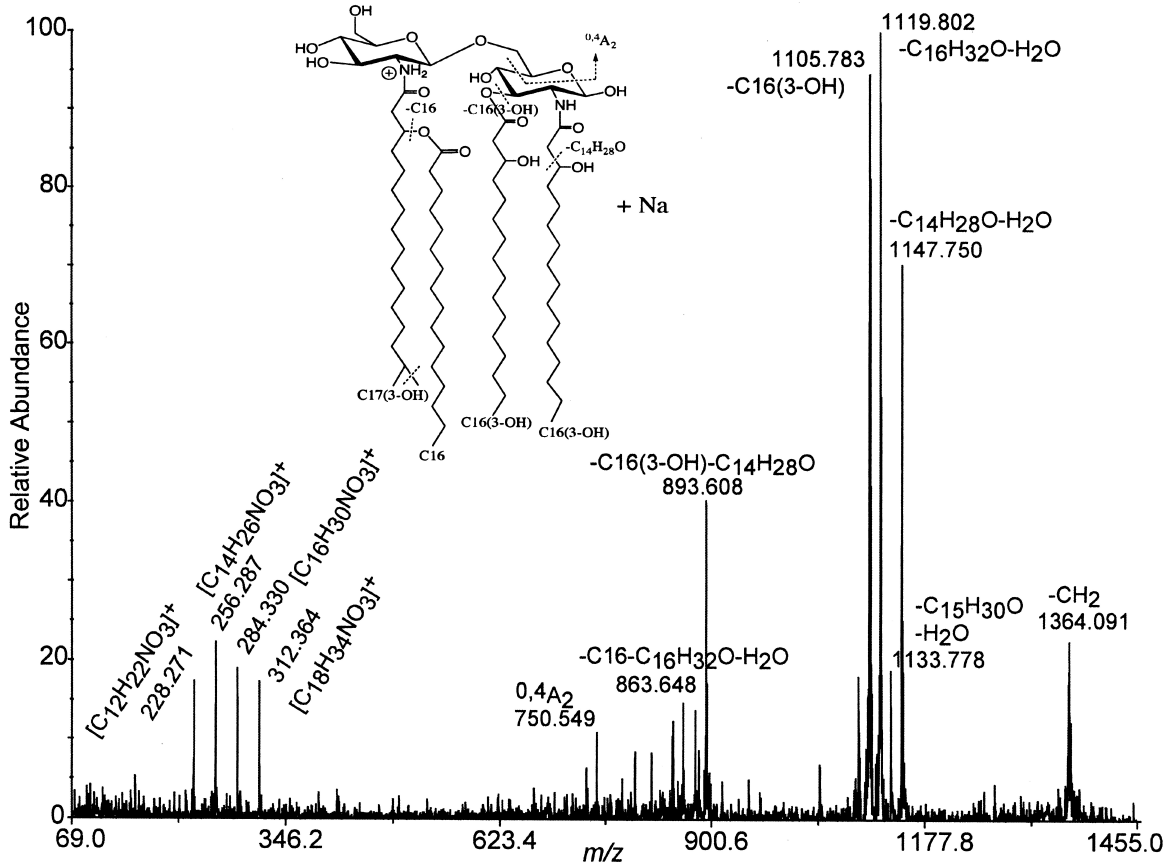

Supplement: NIHMS139265-supplement-Sup_Fig_03.pdf [file NIHMS139265-supplement-Sup_Fig_03.pdf]

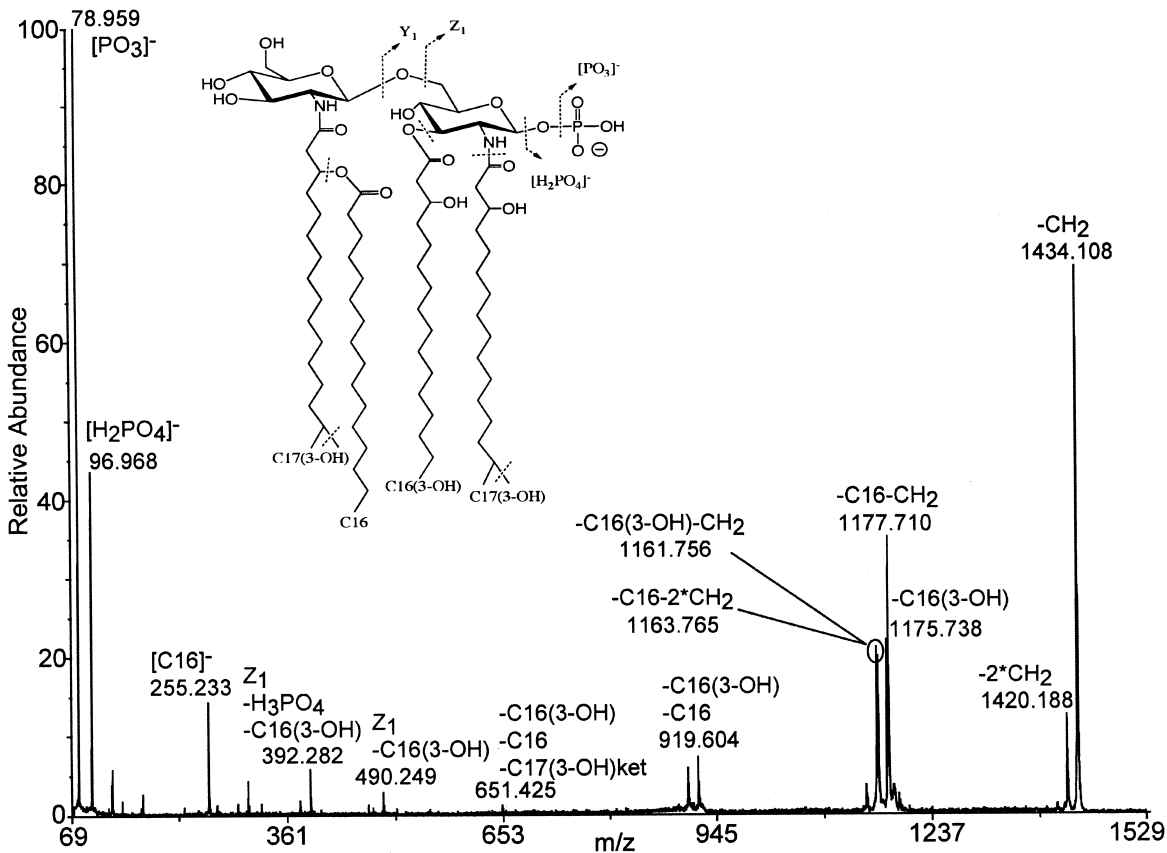

Supplement: NIHMS139265-supplement-Sup_Fig_04.pdf [file NIHMS139265-supplement-Sup_Fig_04.pdf]

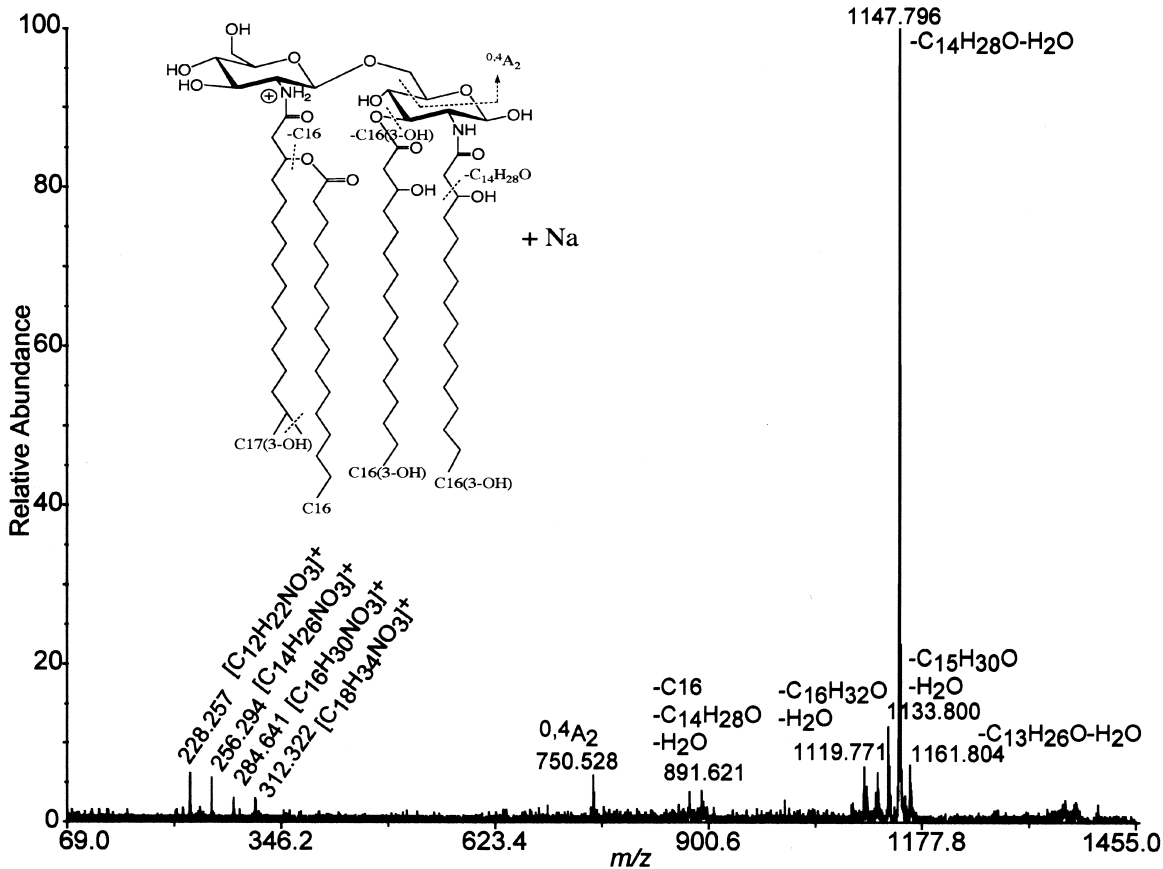

Supplement: NIHMS139265-supplement-Sup_Fig_05.pdf [file NIHMS139265-supplement-Sup_Fig_05.pdf]

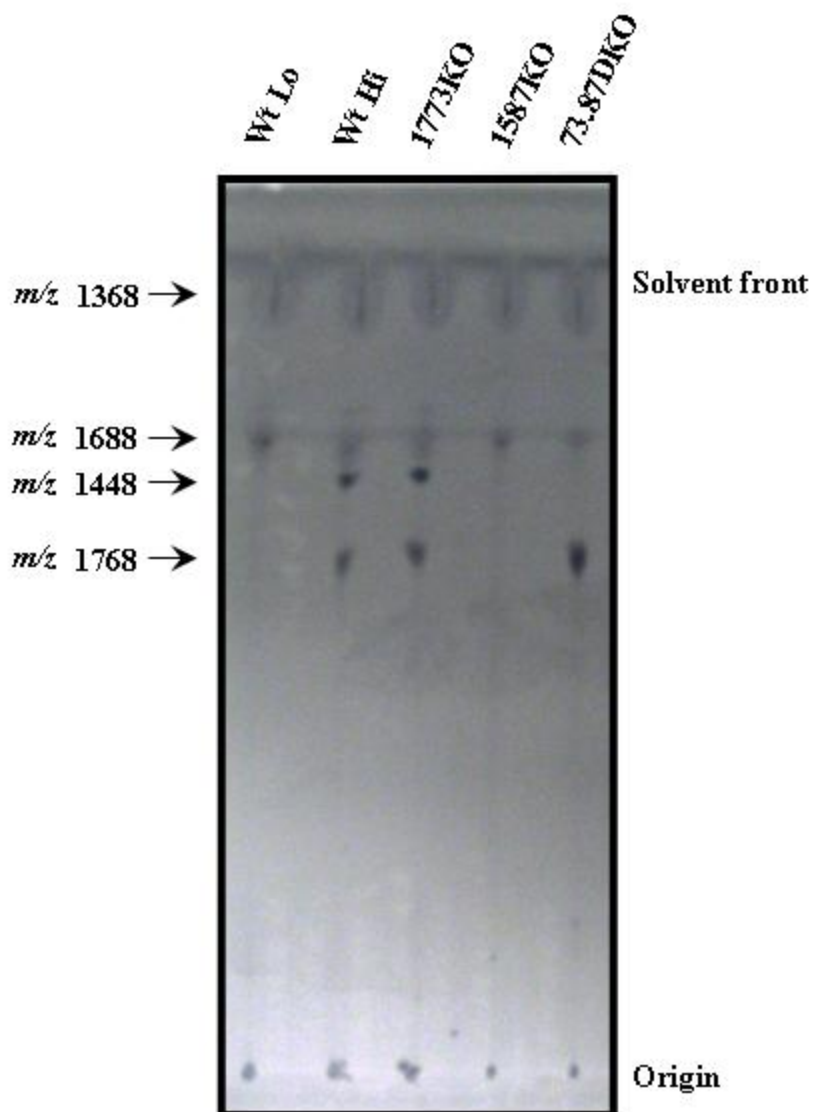

Supplement: NIHMS139265-supplement-Sup_Fig_06.pdf [file NIHMS139265-supplement-Sup_Fig_06.pdf]

### Negative ion MALDI-TOF

### Positive ion MALDI-TOF

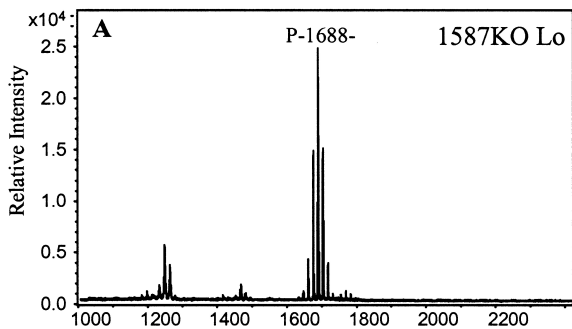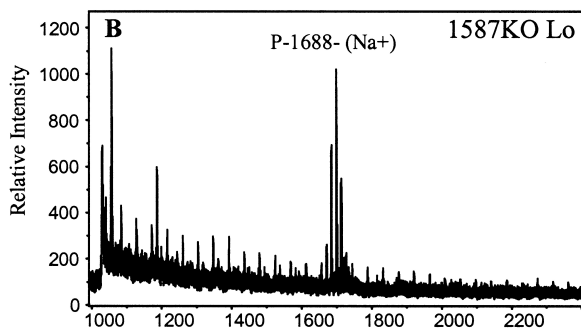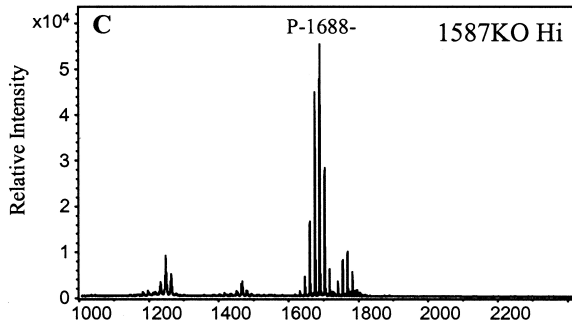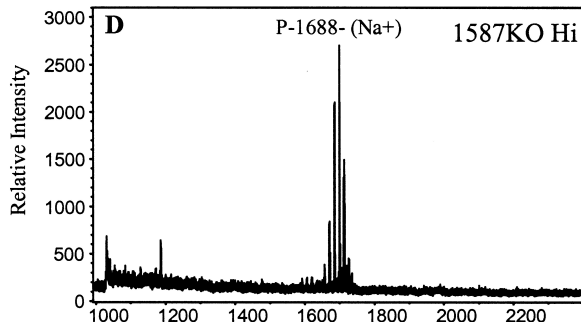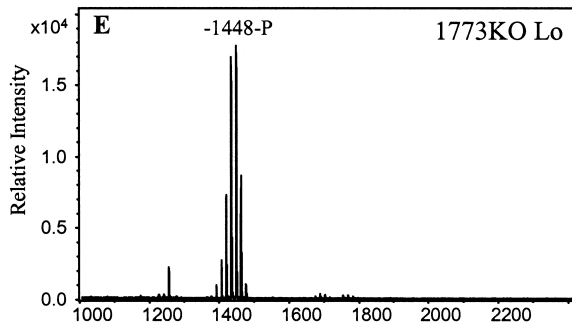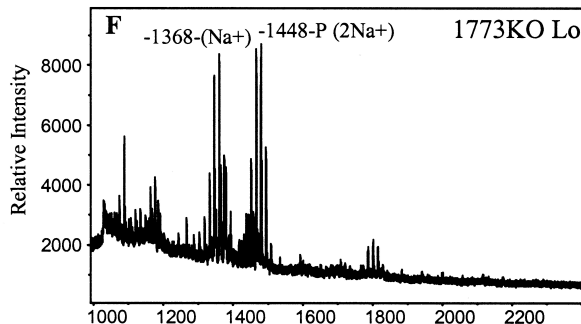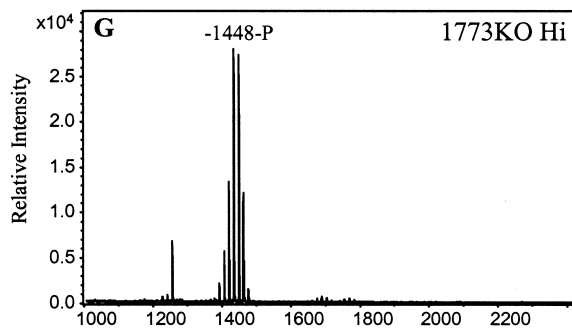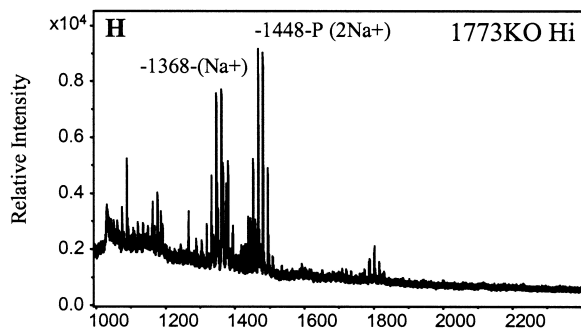

Supplement: NIHMS139265-supplement-Sup_Fig_08.pdf [file NIHMS139265-supplement-Sup_Fig_08.pdf]

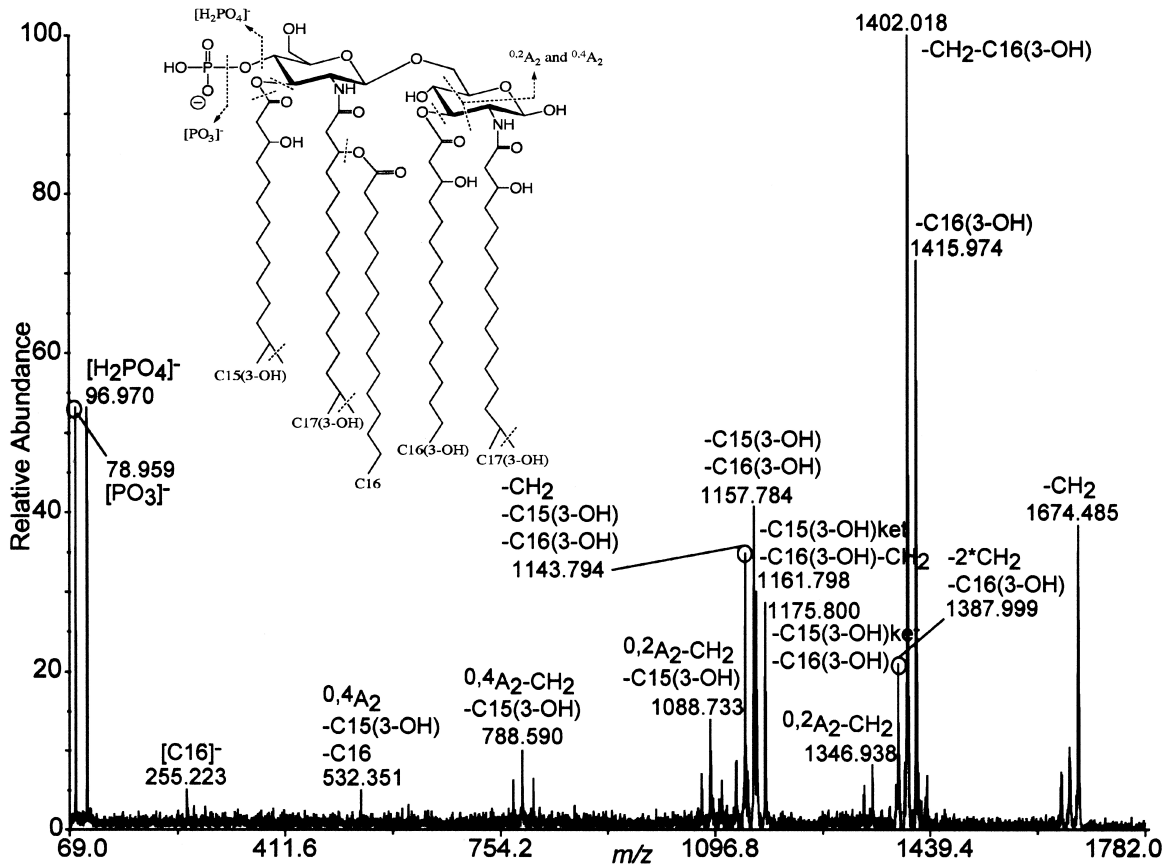

Supplement: NIHMS139265-supplement-Sup_Fig_09.pdf [file NIHMS139265-supplement-Sup_Fig_09.pdf]

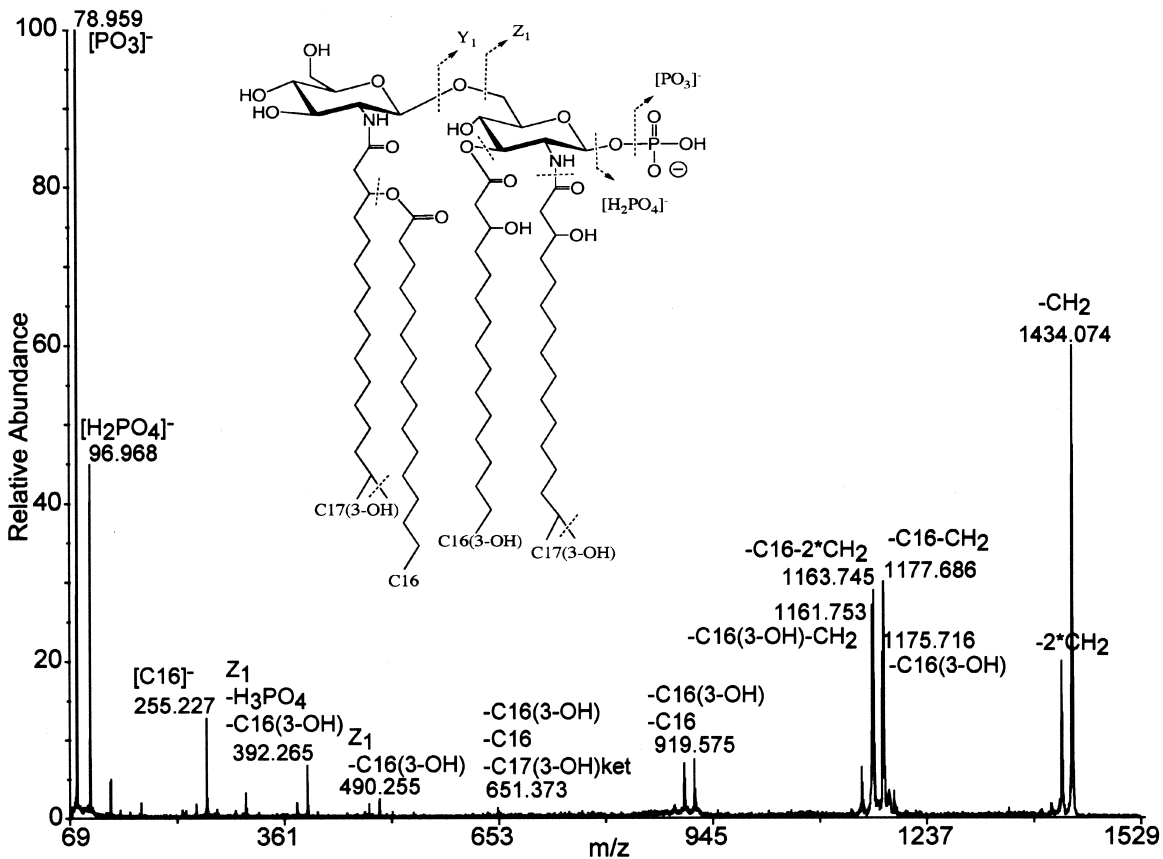

Supplement: NIHMS139265-supplement-Sup_Fig_10.pdf [file NIHMS139265-supplement-Sup_Fig_10.pdf]

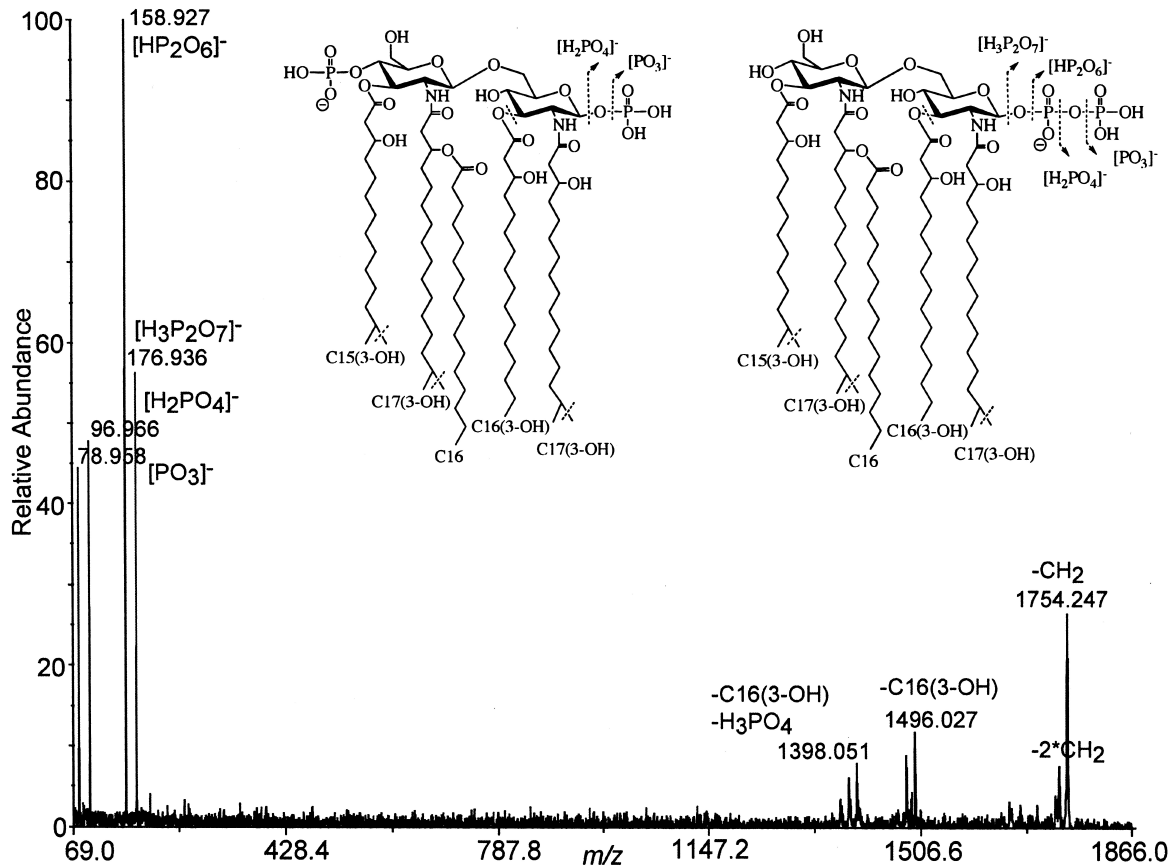

Supplement: NIHMS139265-supplement-Sup_Fig_11.pdf [file NIHMS139265-supplement-Sup_Fig_11.pdf]

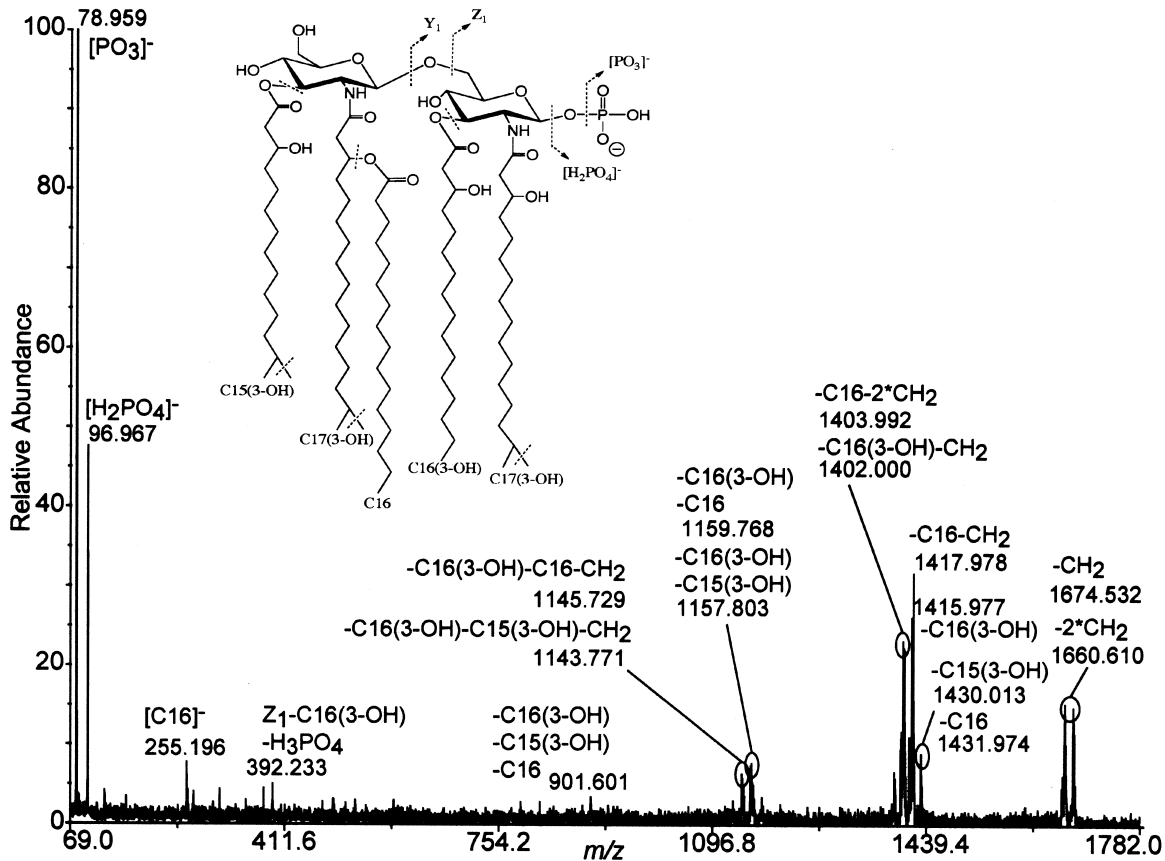

Supplement: NIHMS139265-supplement-Sup_Fig_12.pdf [file NIHMS139265-supplement-Sup_Fig_12.pdf]

**A**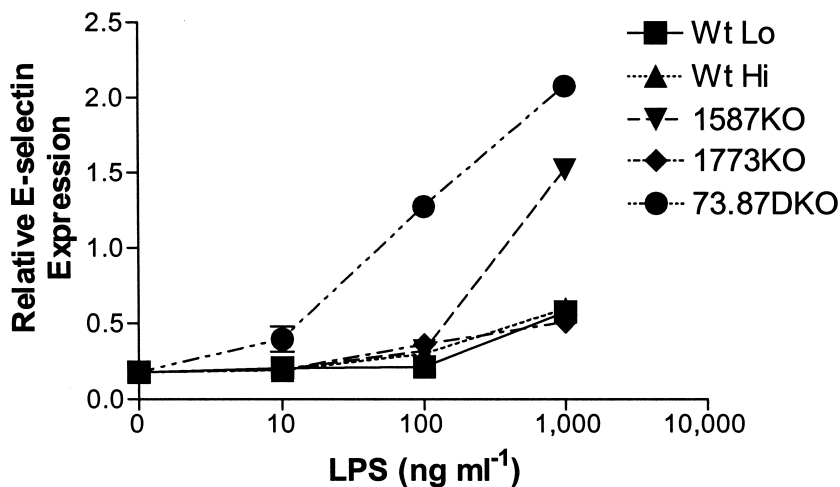**B**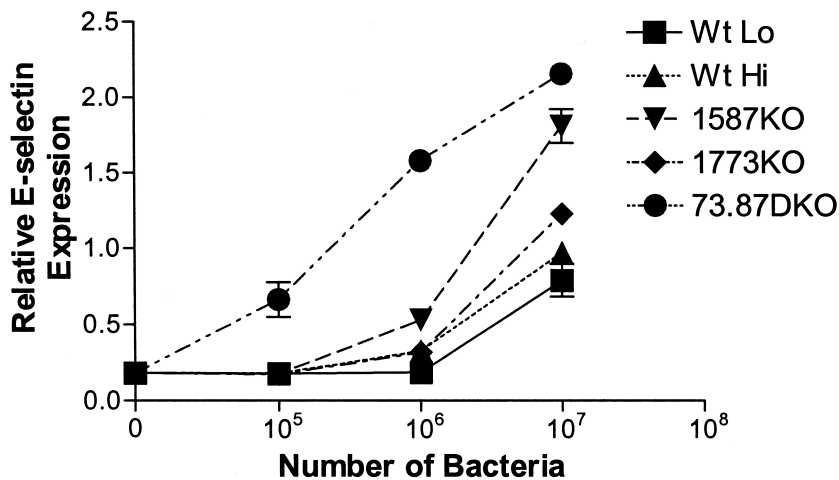

Supplement: NIHMS139265-supplement-Sup_Fig_13.pdf [file NIHMS139265-supplement-Sup_Fig_13.pdf]
